# Supplementary material for: Small and light strain sensors based on graphene coated human hairs
Source: Royal Society of Chemistry journal article supplement (doi:10.1039/c5nr04312c), 2015-01-01
Supplement: c5nr04312c1.pdf [file c5nr04312c1.pdf]

## Supporting Information

# Small and light strain sensors based on graphene coated human hairs

Wenjing Yuan, Qinqin Zhou, Yingru Li and Gaoquan Shi\*

Department of Chemistry, Tsinghua University, Beijing 100084, People's Republic of China

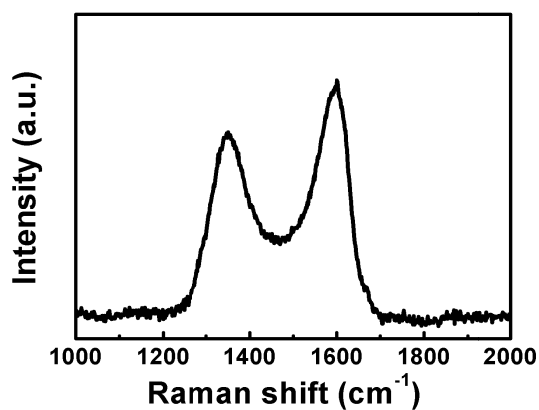

Fig. S1. Raman spectrum of an rGO coated human hair.

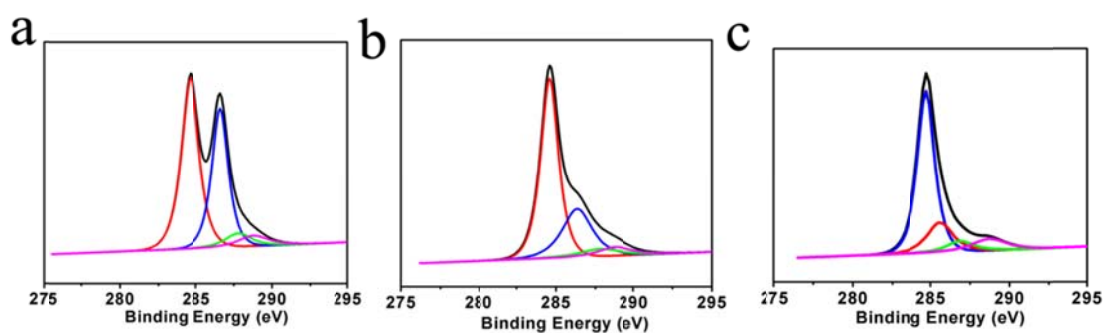

Fig S2. C1s XPS spectra of GO (a), hydrazine reduced GO on rGO-l-hair (b), and ascorbic acid reduced GO on rGO-sp-hair (c).

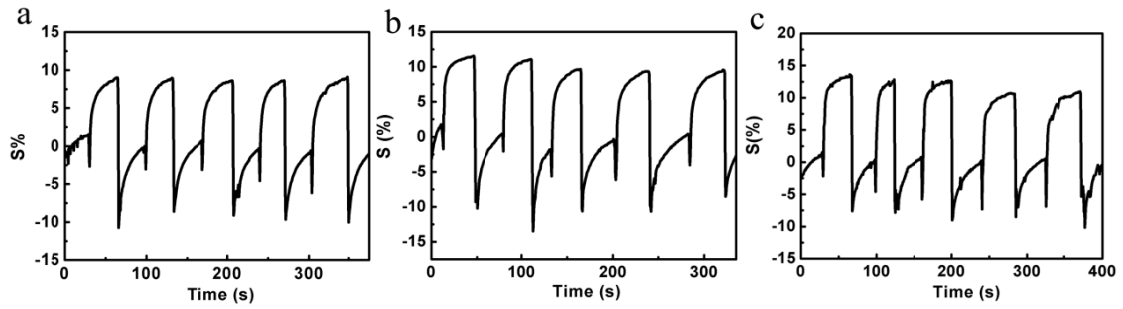

**Fig. S3** Current variations of an rGO-l-hair sensor upon repeatedly bending to radians of (a) 3.2, (b) 2.05 and (c) 0.8 cm, respectively.

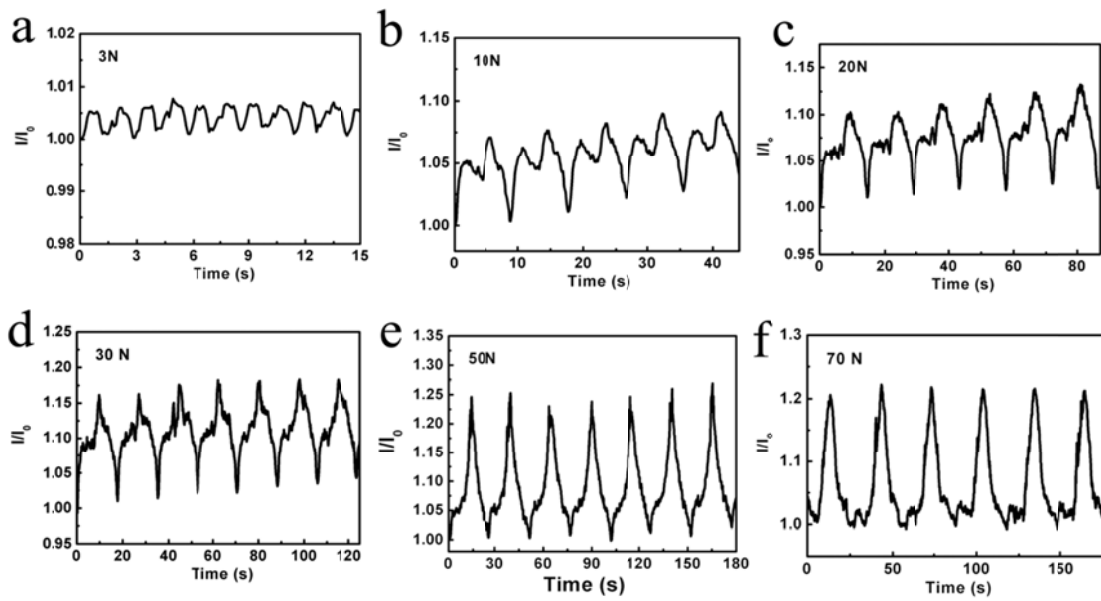

**Fig. S4.** Current responses of an rGO-sp-hair sensor during successive cycles of alternative compression and releasing with compress forces of (a) 3, (b) 10, (c) 20, (d) 30, (e) 50, and (f) 70 N, respectively.
